# Supplementary material
Source: MDPI journal article supplement (https://www.mdpi.com/2304-6740/10/5/60)
Supplement: s1 [file s1]

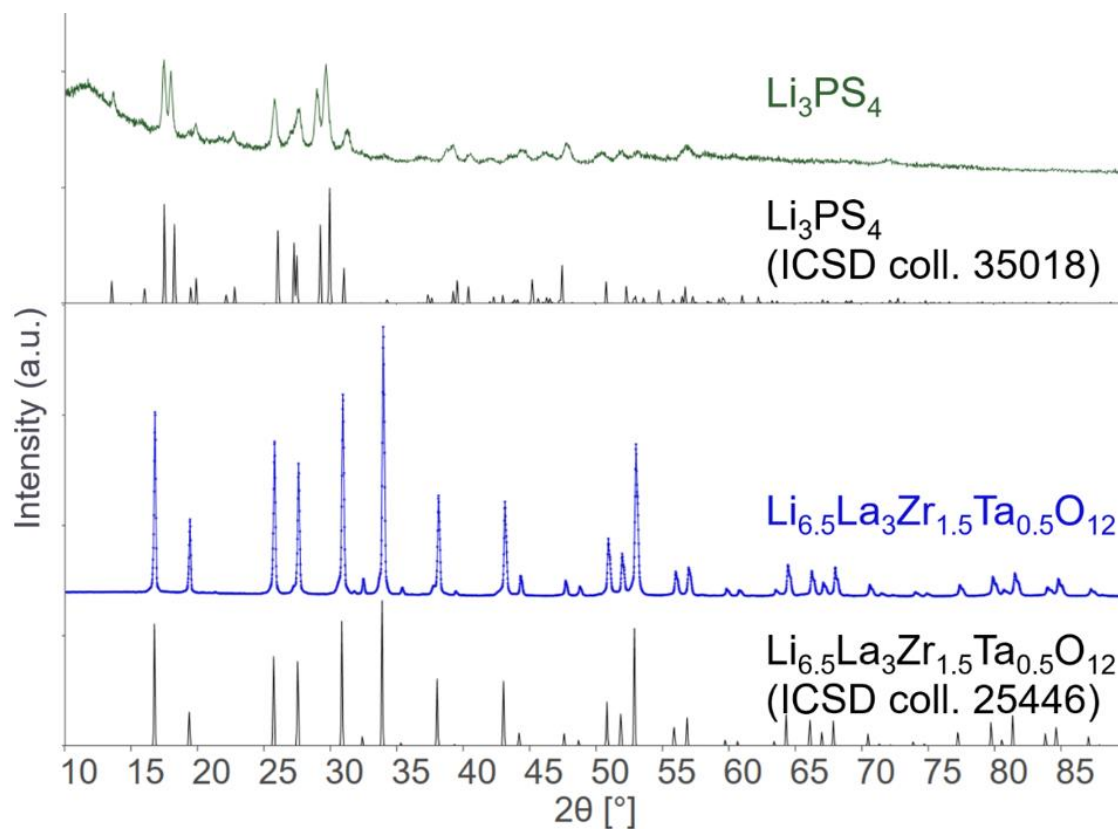

**Figure S1.** X-ray diffraction confirming the phase purity of  $\text{Li}_3\text{PS}_4$  (green) and  $\text{Li}_{6.5}\text{La}_3\text{Zr}_{1.5}\text{Ta}_{0.5}\text{O}_{12}$  (blue).

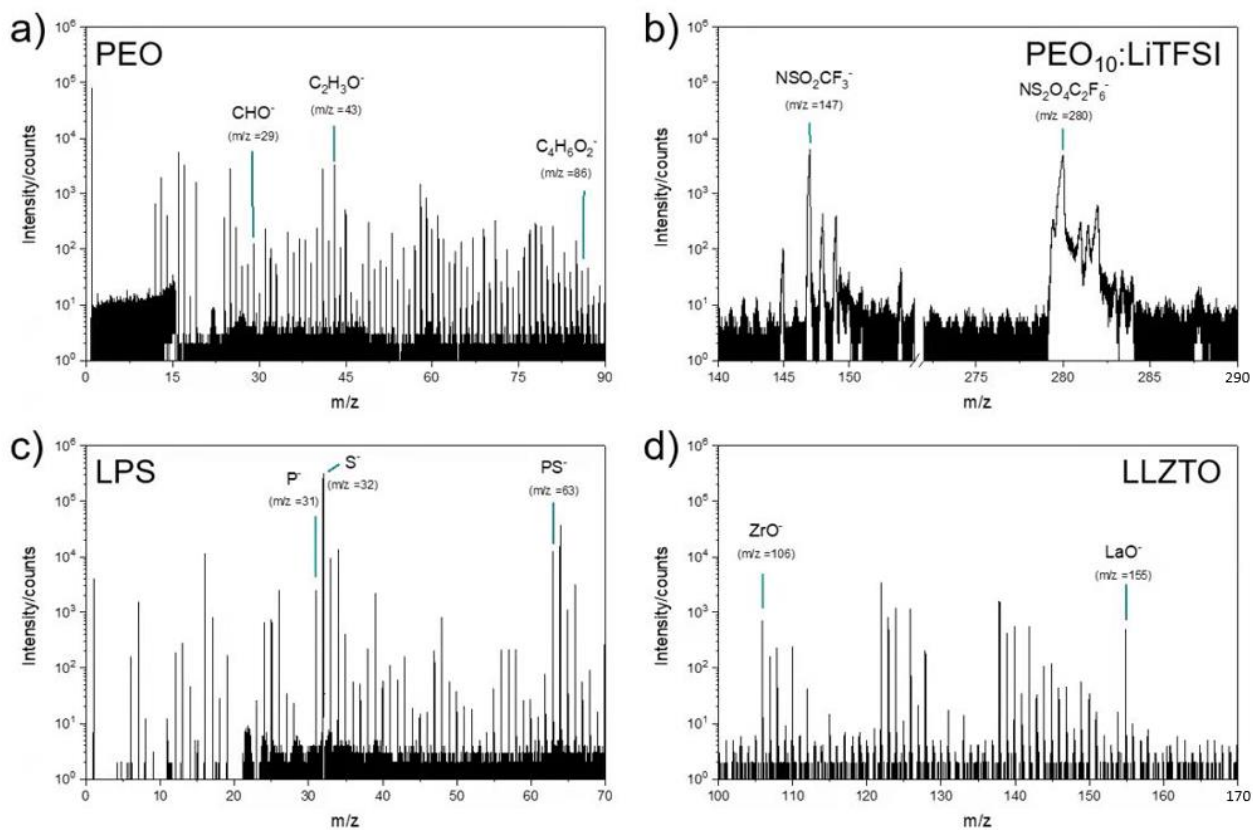

**Figure S2.** ToF-SIMS mass spectra of a) PEO; b)  $\text{PEO}_{10}\text{LiTFSI}$ ; c)  $\text{Li}_3\text{PS}_4$  (LPS); and d)  $\text{Li}_{6.5}\text{La}_3\text{Zr}_{1.5}\text{Ta}_{0.5}\text{O}_{12}$  (LLZTO), with fragments of interest labelled.

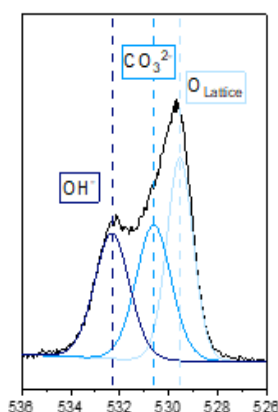

**Figure S3.** X-ray photoelectron spectroscopy showing the O 1s region of the spectrum of a pristine  $\text{Li}_{6.5}\text{La}_3\text{Zr}_{1.5}\text{Ta}_{0.5}\text{O}_{12}$  electrolyte disk, showing the presence of both the  $\text{Li}_{6.5}\text{La}_3\text{Zr}_{1.5}\text{Ta}_{0.5}\text{O}_{12}$  phase and carbonate and hydroxide impurities.

**Table S1.** Table showing the XPS binding energies and assignments of species at the SPE/LPS and SPE/LLZTO interfaces, relating to Figure 3. It should be noted that in the case of doublets, only the binding energy of the peak lowest in binding energy is given.

| Interface                                      | Region | Binding Energy (eV) | Assignment                                  |
|------------------------------------------------|--------|---------------------|---------------------------------------------|
| $\text{PEO}_{10}:\text{LiTFSI} / \text{LPS}$   | C 1s   | 284.4               | $-(\text{CH}_2)- / \text{C}-\text{C}$       |
|                                                |        | 286.1               | $(\text{OCH}_2-\text{CH}_2-)$               |
|                                                | S 2p   | 161.0               | P-S-Li                                      |
|                                                |        | 162.6               | $-\text{S}_0- / \text{P}-\text{S}-\text{P}$ |
|                                                |        | 167.8               | S=O                                         |
|                                                | P 2p   | 132.8               | $\text{PS}_4^{3-}$                          |
|                                                |        | 133.8               | $\text{PS}_x\text{O}_y$                     |
| $\text{PEO}_{10}:\text{LiTFSI} / \text{LLZTO}$ | C 1s   | 286.0               | $(\text{OCH}_2-\text{CH}_2-)$               |
|                                                |        | 290.6               | C-F                                         |
|                                                | O 1s   | 529.4               | $\text{O}_{\text{Lattice}}$                 |
|                                                |        | 530.6               | $\text{OH}^-$                               |
|                                                |        | 532.0               | $\text{CO}_3^{2-}$                          |
|                                                | Zr 3d  | 182.5               | $\text{Zr}_{\text{Lattice}}$                |
